# Supplementary material for: Asymptomatic Lymphogranuloma Venereum in Men who Have Sex with Men, United Kingdom
Source: PubMed Central journal article supplement (PMC4696683; doi:10.3201/eid2201.141867), 2016-01
Supplement: 14-1867-Techapp-s1.pdf [file 14-1867-Techapp-s1.pdf]

# Asymptomatic Lymphogranuloma Venereum in Men who Have Sex with Men, United Kingdom

## Technical Appendix

### Checklist of symptoms for all patients CT-positive

| Patient details                                                                                                                                                       |                                                       |                                                               |                       |                                                          |
|-----------------------------------------------------------------------------------------------------------------------------------------------------------------------|-------------------------------------------------------|---------------------------------------------------------------|-----------------------|----------------------------------------------------------|
| Patient ID: _____                                                                                                                                                     |                                                       | Date of birth: __/__/____                                     |                       |                                                          |
| Sexual history                                                                                                                                                        |                                                       |                                                               |                       |                                                          |
| Last sexual intercourse                                                                                                                                               |                                                       | Date: __/__/____                                              | or                    | # of weeks ago: __                                       |
|                                                                                                                                                                       |                                                       |                                                               | or                    | # of months ago: __                                      |
| # of sexual partners last 6 months: __                                                                                                                                |                                                       |                                                               |                       |                                                          |
| Attendance history                                                                                                                                                    |                                                       |                                                               |                       |                                                          |
| 1st attendance date: __/__/____                                                                                                                                       |                                                       | 2nd attendance date: __/__/____                               |                       | DNA at 2 <sup>nd</sup> attendance: Yes / No / Don't know |
| Diagnosis & treatment                                                                                                                                                 |                                                       |                                                               |                       |                                                          |
| Sample                                                                                                                                                                | Date: __/__/____                                      | Urethral                                                      | Rectal                | Pharyngeal                                               |
|                                                                                                                                                                       | Chlamydia positive *                                  | Yes / No / Don't know                                         | Yes / No / Don't know | Yes / No / Don't know                                    |
|                                                                                                                                                                       | LGV positive *                                        | Yes / No / Don't know                                         | Yes / No / Don't know | Yes / No / Don't know                                    |
| Was patient treated for chlamydia between 1st and 2 <sup>nd</sup> attendance? Yes / No / Don't Know                                                                   |                                                       |                                                               |                       |                                                          |
| Symptoms (* please provide answers for ALL symptom indicators below (white and grey) for LGV positives and just those in white for chlamydia positives/LGV negatives) |                                                       |                                                               |                       |                                                          |
| Symptoms at 1 <sup>st</sup> attendance: Yes / No / Don't know                                                                                                         |                                                       | Symptoms at 2 <sup>nd</sup> attendance: Yes / No / Don't know |                       |                                                          |
| Onset of symptoms                                                                                                                                                     |                                                       | Date: __/__/____                                              | or                    | # of weeks ago: __                                       |
|                                                                                                                                                                       |                                                       |                                                               | or                    | # of months ago: __                                      |
| * Chlamydia & LGV symptoms (please answer for ALL patients)                                                                                                           |                                                       |                                                               |                       | Duration of symptoms (days)                              |
| Rectal                                                                                                                                                                | Tenesmus / hard                                       |                                                               | Yes / No / Don't know | --                                                       |
|                                                                                                                                                                       | Anorectal pain / hard                                 |                                                               | Yes / No / Don't know | --                                                       |
|                                                                                                                                                                       | Rectal bleeding / hard                                |                                                               | Yes / No / Don't know | --                                                       |
|                                                                                                                                                                       | Rectal Discharge / hard                               |                                                               | Yes / No / Don't know | --                                                       |
| Penile / urethral                                                                                                                                                     | Penile discharge / hard                               |                                                               | Yes / No / Don't know | --                                                       |
|                                                                                                                                                                       | Epididymitis / soft                                   |                                                               | Yes / No / Don't know | --                                                       |
|                                                                                                                                                                       | Pain on urination / soft                              |                                                               | Yes / No / Don't know | --                                                       |
| Pharyngeal                                                                                                                                                            | Pharyngitis / soft                                    |                                                               | Yes / No / Don't know | --                                                       |
|                                                                                                                                                                       | Tonsillitis / soft                                    |                                                               | Yes / No / Don't know | --                                                       |
| Other                                                                                                                                                                 | Lymphadenopathy, (please specify site in 'Other')     |                                                               | Yes / No / Don't know | --                                                       |
|                                                                                                                                                                       | Swollen / painful joints                              |                                                               | Yes / No / Don't know | --                                                       |
|                                                                                                                                                                       | Itchy / red eyes                                      |                                                               | Yes / No / Don't know | --                                                       |
|                                                                                                                                                                       | Other (please specify)                                |                                                               | --                    | --                                                       |
| * Additional LGV symptoms (please answer for LGV patients ONLY)                                                                                                       |                                                       |                                                               |                       | Duration of symptoms (days)                              |
| Rectal                                                                                                                                                                | Anorectal ulceration / hard                           |                                                               | Yes / No / Don't know | --                                                       |
|                                                                                                                                                                       | Bloody stools / hard                                  |                                                               | Yes / No / Don't know | --                                                       |
|                                                                                                                                                                       | Contact bleeding / hard                               |                                                               | Yes / No / Don't know | --                                                       |
|                                                                                                                                                                       | Recent constipation / hard                            |                                                               | Yes / No / Don't know | --                                                       |
|                                                                                                                                                                       | Change in bowel habit / soft                          |                                                               | Yes / No / Don't know | --                                                       |
|                                                                                                                                                                       | Perianal itch / irritation / soft                     |                                                               | Yes / No / Don't know | --                                                       |
| Penile / urethral                                                                                                                                                     | Penile ulcers / abscess / hard                        |                                                               | Yes / No / Don't know | --                                                       |
| Pharyngeal                                                                                                                                                            | Swollen/painful neck nodes / hard                     |                                                               | Yes / No / Don't know | --                                                       |
|                                                                                                                                                                       | Mouth ulcers / soft                                   |                                                               | Yes / No / Don't know | --                                                       |
| Other                                                                                                                                                                 | Swollen inguinal lymph nodes/buboes / hard            |                                                               | Yes / No / Don't know | --                                                       |
|                                                                                                                                                                       | Painful lymph nodes / hard                            |                                                               | Yes / No / Don't know | --                                                       |
|                                                                                                                                                                       | Erythema nodosum (tender red nodules on shins) / hard |                                                               | Yes / No / Don't know | --                                                       |
|                                                                                                                                                                       | Weight loss / soft                                    |                                                               | Yes / No / Don't know | --                                                       |
|                                                                                                                                                                       | Fever / soft                                          |                                                               | Yes / No / Don't know | --                                                       |
|                                                                                                                                                                       | Muscle / joint pain / soft                            |                                                               | Yes / No / Don't know | --                                                       |
|                                                                                                                                                                       | Malaise / soft                                        |                                                               | Yes / No / Don't know | --                                                       |
| Other (please specify)                                                                                                                                                |                                                       | --                                                            | --                    |                                                          |

**Technical Appendix Figure.** Online symptom checklist posted on Public Health England site for detection of asymptomatic lymphogranuloma venereum infection in men who have sex with men, United Kingdom.
